# Supplementary material for: Isolating Cu-Zn active-sites in Ordered Intermetallics to Enhance Nitrite-to-Ammonia Electroreduction
Source: PubMed Central journal article supplement — Nat Commun. 2024 Nov 23;15:10173. doi: 10.1038/s41467-024-53897-9 (PMC11585598; doi:10.1038/s41467-024-53897-9), 2024-11-23
Supplement: 41467_2024_53897_MOESM1_ESM.pdf [file 41467_2024_53897_MOESM1_ESM.pdf]

## **Supplementary information**

### **Isolating Cu-Zn active-sites in Ordered Intermetallics to Enhance Nitrite-to-Ammonia Electroreduction**

Jiao Lan<sup>1,3</sup>, Zhen Wang<sup>1,3</sup>, Cheng-wei Kao<sup>2</sup>, Ying-Rui Lu<sup>2</sup>, Feng Xie<sup>1</sup>, Yongwen Tan<sup>1\*</sup>

<sup>1</sup> College of Materials Science and Engineering, Hunan University, Changsha, Hunan 410082, China.

<sup>2</sup> National Synchrotron Radiation Research Center, Hsinchu 300092, Taiwan.

<sup>3</sup> Jiao Lan and Zhen Wang contributed equally to this work

\*e-mail: tanyw@hnu.edu.cn

## Table of Contents

1. Supplementary Fig. 1| XRD spectra of Cu<sub>6</sub>Zn<sub>94</sub> and Cu<sub>15</sub>Zn<sub>85</sub> ribbons.
2. Supplementary Fig. 2| The LSV curve of the Cu<sub>15</sub>Zn<sub>85</sub> ribbons in 1 M KOH.
3. Supplementary Fig. 3| The chronoamperometry curves of np/CuZn<sub>5</sub>, np/CuZn<sub>4</sub>, np/Cu<sub>5</sub>Zn<sub>8</sub>, np/ISAA-CuZn, and np/Cu at the corresponding voltages.
4. Supplementary Fig. 4| XRD spectra of np/CuZn<sub>5</sub>.
5. Supplementary Fig. 5| Crystal structure of Cu-Zn IMCs.
6. Supplementary Fig. 6| SEM images of np/CuZn<sub>4</sub>.
7. Supplementary Fig. 7| SEM images of np/Cu<sub>5</sub>Zn<sub>8</sub>.
8. Supplementary Fig. 8| SEM images of np/ISAA-CuZn.
9. Supplementary Fig. 9| SEM-EDS test results.
10. Supplementary Fig. 10| The results of BET test.
11. Supplementary Fig. 11| EDS composition line diagrams of np/ISAA-CuZn.
12. Supplementary Fig. 12| The fitted average oxidation states.
13. Supplementary Fig. 13| WT-EXAFS spectra.
14. Supplementary Fig. 14| SEM images of np/Cu.
15. Supplementary Fig. 15| XRD spectra of Cu<sub>30</sub>Zn<sub>70</sub> ribbons and np/Cu.
16. Supplementary Fig. 16| LSV curves.
17. Supplementary Fig. 17| Calibration curve used for estimation of NH<sub>3</sub>.
18. Supplementary Fig. 18| The H<sub>2</sub> and N<sub>2</sub> FE of np/ISAA-CuZn at -0.2 - -0.8 V vs. RHE in 0.2 M KHCO<sub>3</sub> + 10 mM KNO<sub>2</sub>.
19. Supplementary Fig. 19| The NH<sub>3</sub> yield rate and FE of np/ISAA-CuZn.
20. Supplementary Fig. 20| Electrochemically active surface area (ECSA) tests.
21. Supplementary Fig. 21| Calibration curve used for estimation of NO<sub>2</sub><sup>-</sup>.
22. Supplementary Fig. 22| NO<sub>2</sub><sup>-</sup> concentration before and after reaction at -0.5 V vs. RHE.
23. Supplementary Fig. 23| The H<sub>2</sub> and N<sub>2</sub> FE of np/ISAA-CuZn at -0.4 - -0.8 V vs. RHE in 0.2 M KHCO<sub>3</sub> + 1 mM KNO<sub>2</sub>.
24. Supplementary Fig. 24| The NH<sub>3</sub> FE(a) and yield rate (b) for np/ISAA-CuZn with

concentrations of  $\text{NO}_2^-$  ranging from 1mM to 1 M.

25. Supplementary Fig. 25|  $\text{NO}_2^-$ -N concentration in solution after MEA test.

26. Supplementary Fig. 26| Morphology and composition of np/ISAA-CuZn after MEA test.

27. Supplementary Fig. 27| Optical photograph of the tailor-made electrolytic cell used. for in situ XAS characterization.

28. Supplementary Fig. 28| In situ XAS measurements of np/Cu at different applied potentials.

29. Supplementary Fig.29| Optical photograph of the tailor-made electrolytic cell used. for in situ ATR-SEIRAS characterization.

30. Supplementary Fig. 30| Reaction pathway of the  $\text{NO}_2\text{RR}$  and adsorption models of intermediates on Cu (111) surfaces.

31. Supplementary Fig. 31| Reaction pathway of the  $\text{NO}_2\text{RR}$  and adsorption models of intermediates on  $\text{CuZn}_4$  surfaces.

32. Supplementary Fig. 32| Reaction pathway of the  $\text{NO}_2\text{RR}$  and adsorption models of intermediates on  $\text{Cu}_5\text{Zn}_8$  surfaces.

33. Supplementary Fig. 33| Reaction pathway of the  $\text{NO}_2\text{RR}$  and adsorption models of intermediates on ISAA-CuZn surfaces.

34. Supplementary Fig. 34| Modelling of adsorption of  $^*\text{NOOH}$  and  $^*\text{HNOO}$  intermediates on Cu,  $\text{CuZn}_4$ ,  $\text{Cu}_5\text{Zn}_8$  and ISAA-CuZn surfaces, respectively.

35. Supplementary Fig. 35| The relationship between computational  $\epsilon$  and  $\Delta G$  of  $^*\text{NO}_2$  protonation.

36. Supplementary Fig. 36| Calculated of the water dissociation step on Cu and np/ISAA-CuZn surfaces.

37. Supplementary Table 1 ICP-OES test result.

38. Supplementary Table 2 EXAFS fitting parameters.

39. Supplementary Table 3 Total energy and free energy correction value.

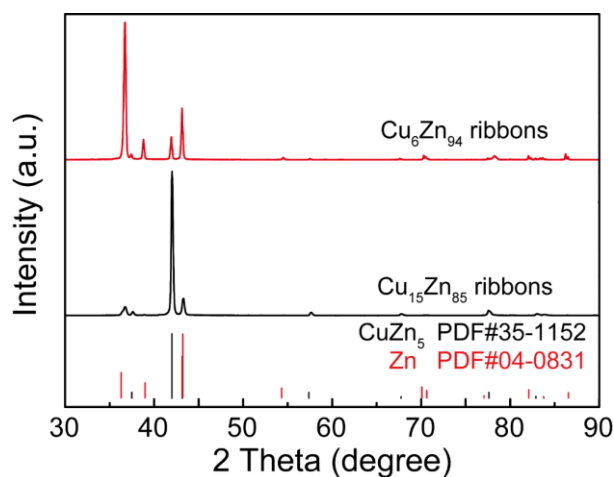

**Supplementary Fig. 1| XRD spectra of  $\text{Cu}_6\text{Zn}_{94}$  and  $\text{Cu}_{15}\text{Zn}_{85}$  ribbons.**

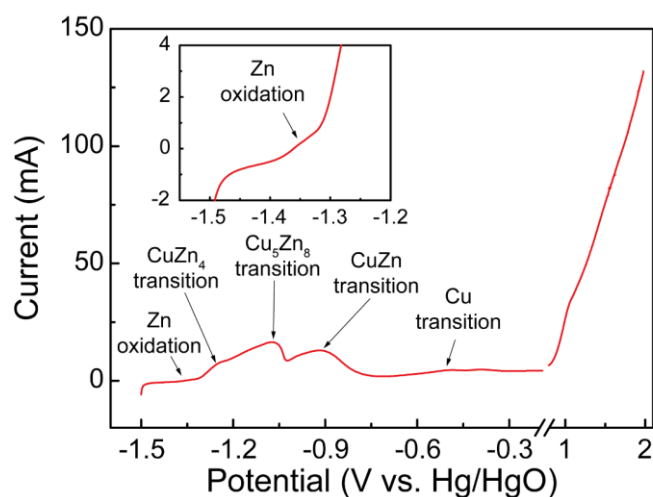

**Supplementary Fig. 2| The LSV curve of the  $\text{Cu}_{15}\text{Zn}_{85}$  ribbons in 1 M KOH.**

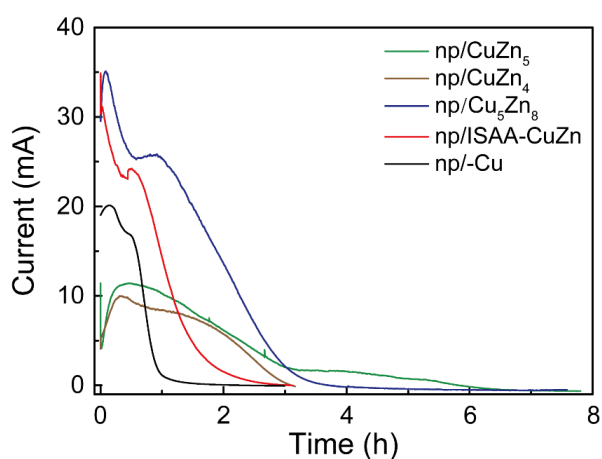

**Supplementary Fig. 3| The chronoamperometry curves of np/ $\text{CuZn}_5$ , np/ $\text{CuZn}_4$ , np/ $\text{Cu}_5\text{Zn}_8$ , np/ISAA-CuZn, and np/Cu at the corresponding voltages.**

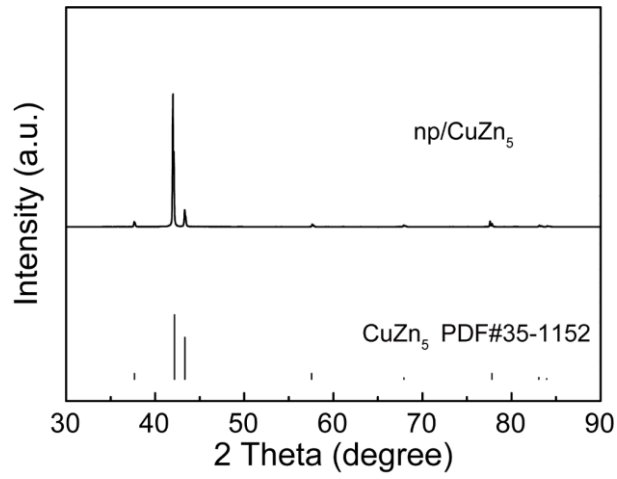

Supplementary Fig. 4| XRD spectra of np/CuZn<sub>5</sub>.

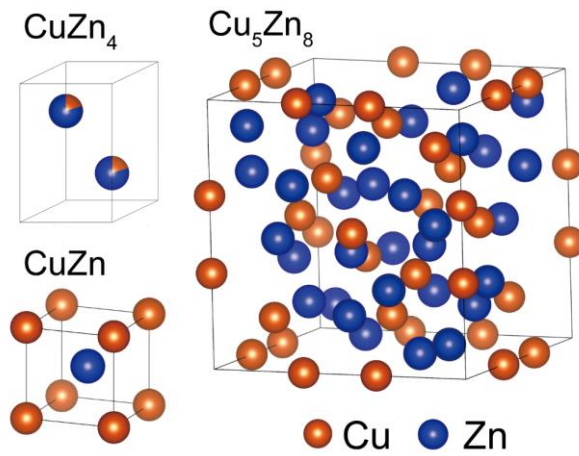

Supplementary Fig. 5| Crystal structure of Cu-Zn IMCs.

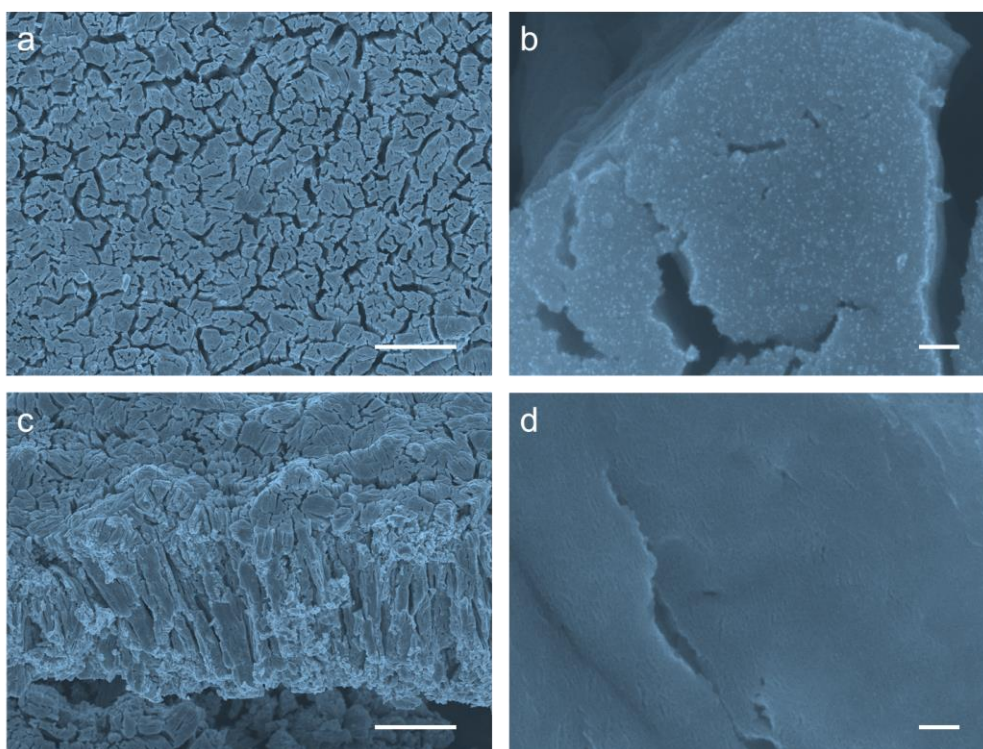

**Supplementary Fig. 6** | SEM images of np/CuZn<sub>4</sub>. Scale bars: **a, c** 10 μm, **b, d** 100

nm.

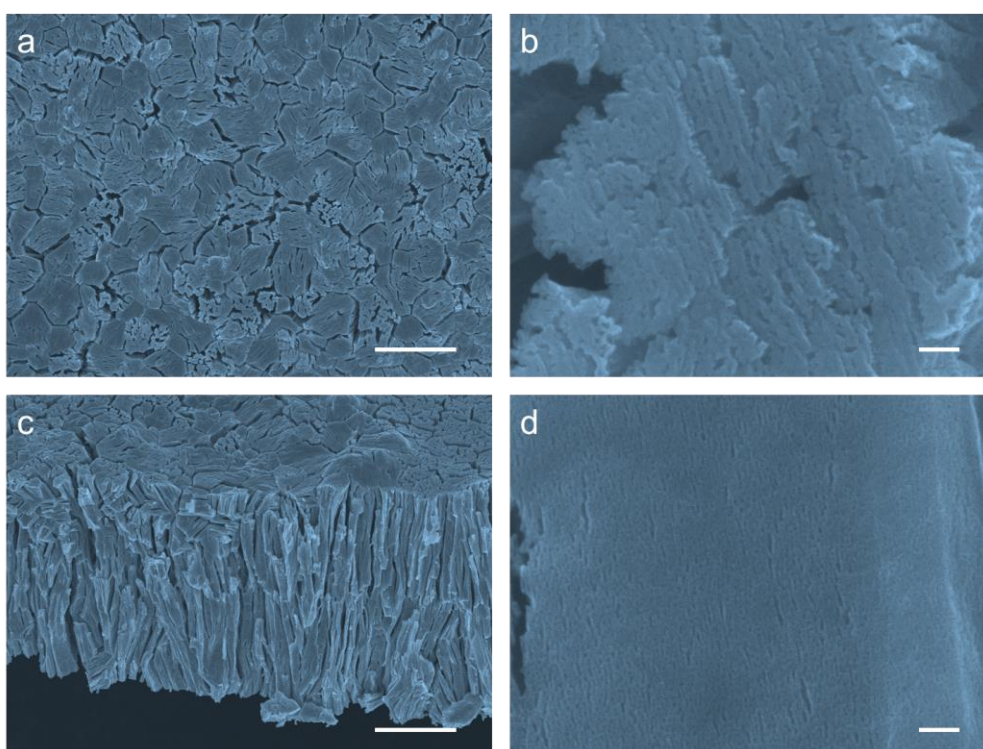

**Supplementary Fig. 7** | SEM images of np/Cu<sub>5</sub>Zn<sub>8</sub>. Scale bars: **a, c** 10 μm, **b, d** 100

nm.

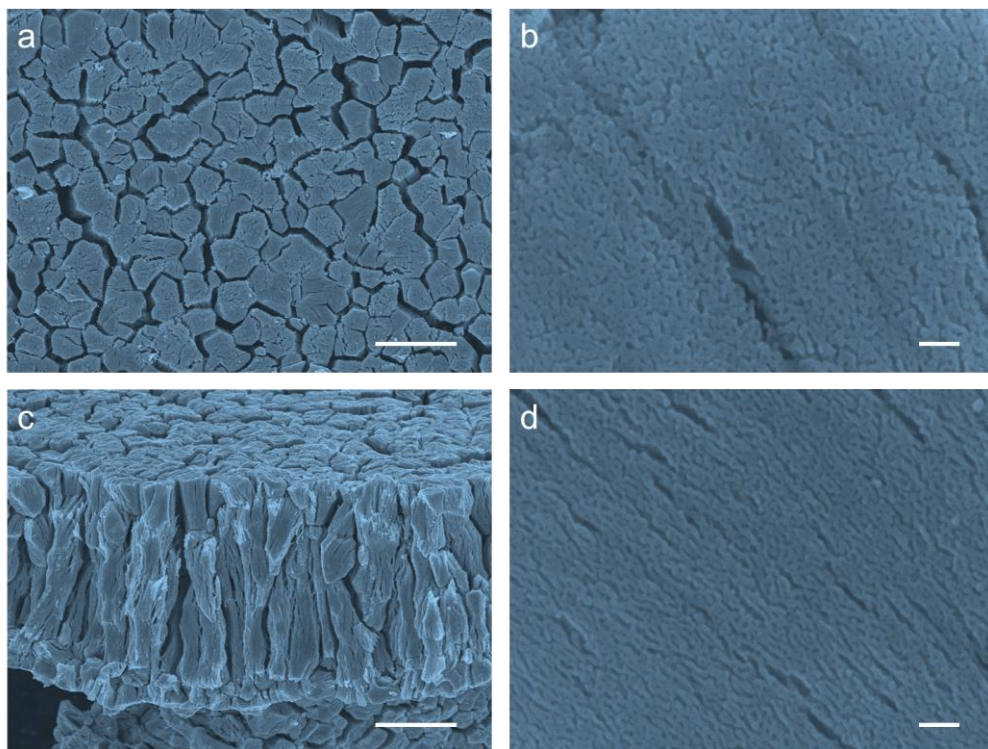

**Supplementary Fig. 8** | SEM images of np/ISAA-CuZn. Scale bars: **a, c** 10  $\mu\text{m}$ , **b, d** 100 nm.

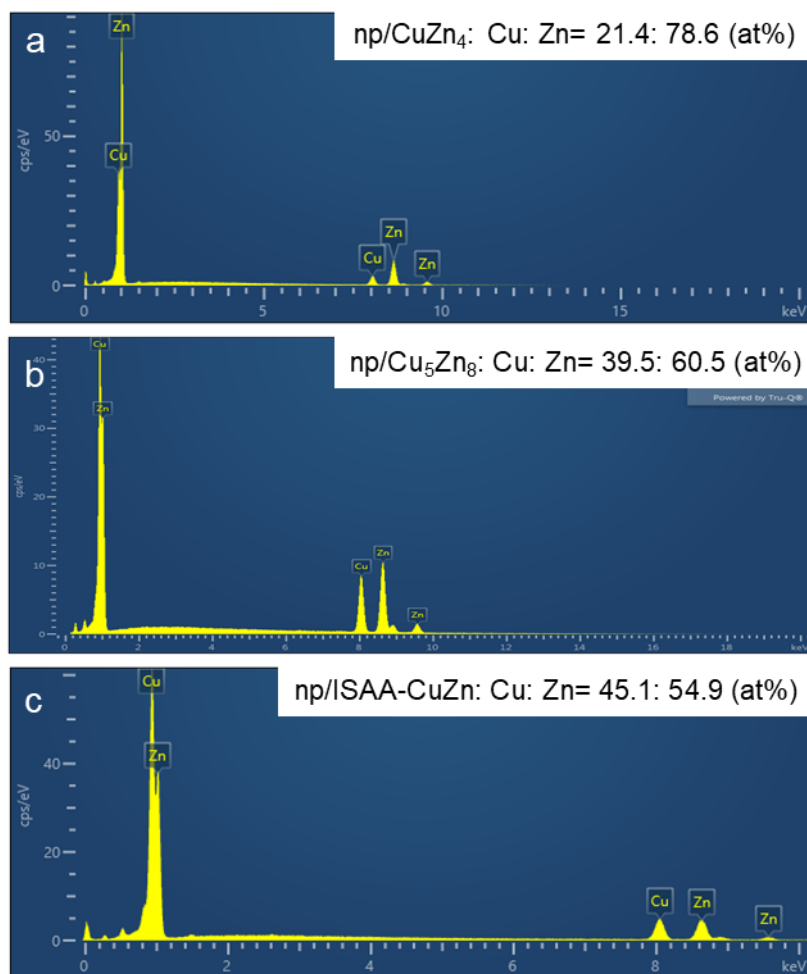

**Supplementary Fig. 9** | SEM-EDS test results. EDS spectroscopy and corresponding element content of np/CuZn<sub>4</sub> (a), np/Cu<sub>5</sub>Zn<sub>8</sub> (b), np/ISAA-CuZn (c).

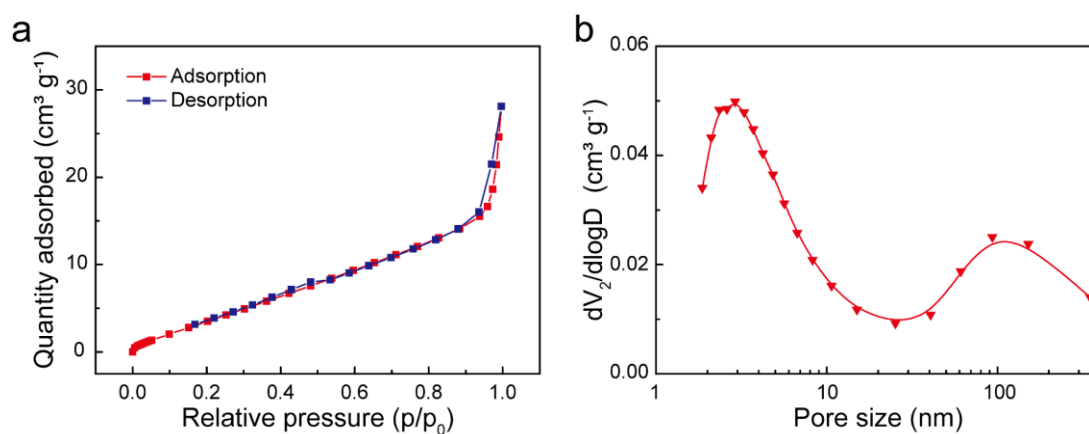

**Supplementary Fig. 10** | The results of BET test. Nitrogen adsorption/desorption curves (a) and pore size distribution (b) of np/ISAA-CuZn.



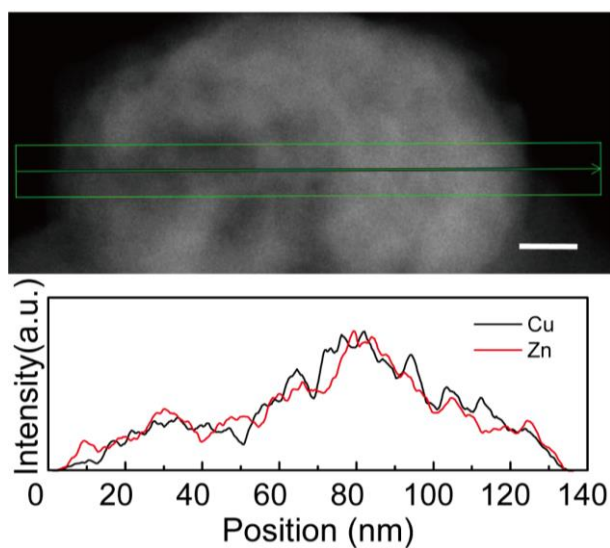

**Supplementary Fig. 11| EDS composition line diagrams of np/ISAA-CuZn.** Scale bar: 5 nm.

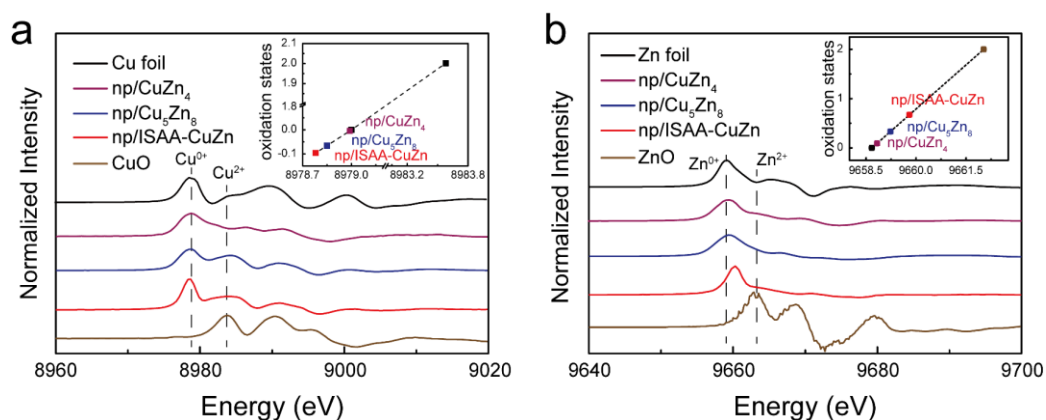

**Supplementary Fig. 12| The fitted average oxidation states. a,** The first derivatives of the Cu K-edge XANES spectra of of np/CuZn<sub>4</sub>, np/Cu<sub>5</sub>Zn<sub>8</sub>, np/ISAA-CuZn, Cu foil, and CuO, insert: average oxidation states of Cu. **b,** The first derivatives of the Zn K-edge XANES spectra of of np/CuZn<sub>4</sub>, np/Cu<sub>5</sub>Zn<sub>8</sub>, np/ISAA-CuZn, Zn foil, and ZnO, insert: average oxidation states of Zn.

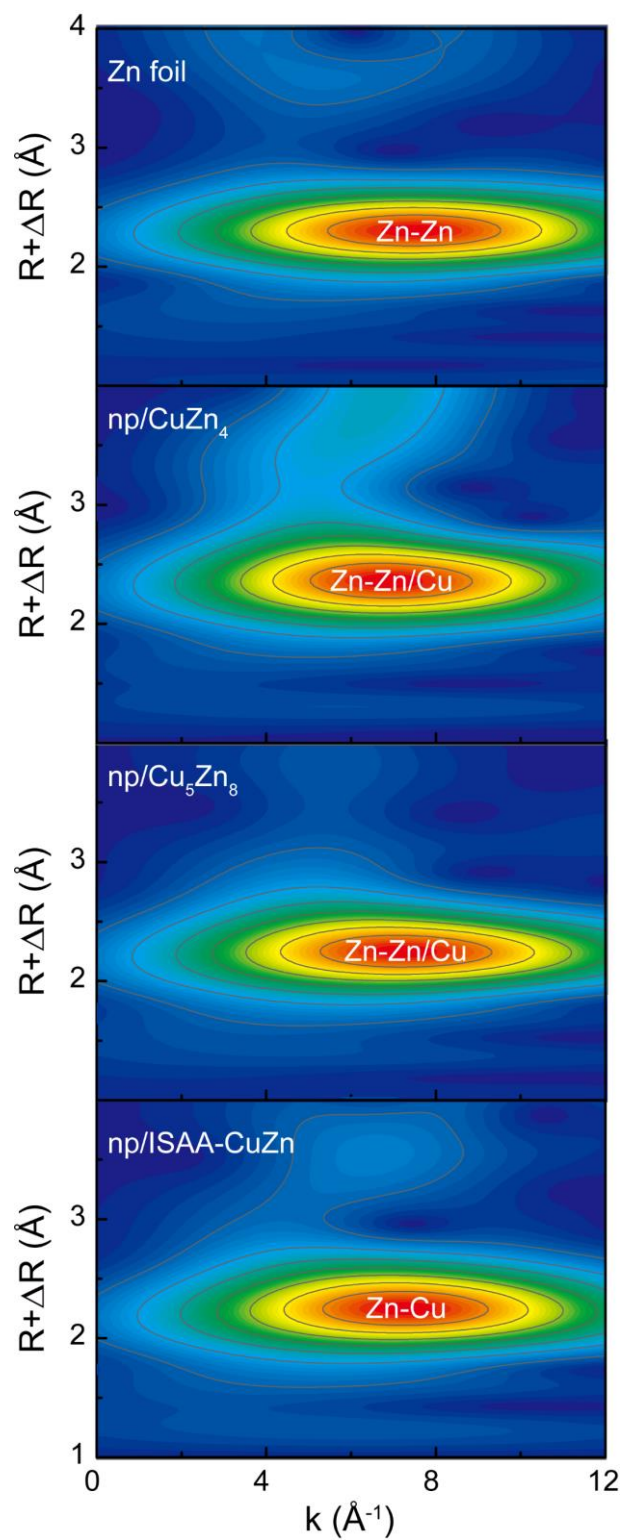

**Supplementary Fig. 13 | WT-EXAFS spectra.** The Zn K-edge WT-EXAFS spectra of  $\text{np/CuZn}_4$ ,  $\text{np/Cu}_5\text{Zn}_8$ ,  $\text{np/ISAA-CuZn}$ , and Zn foil.

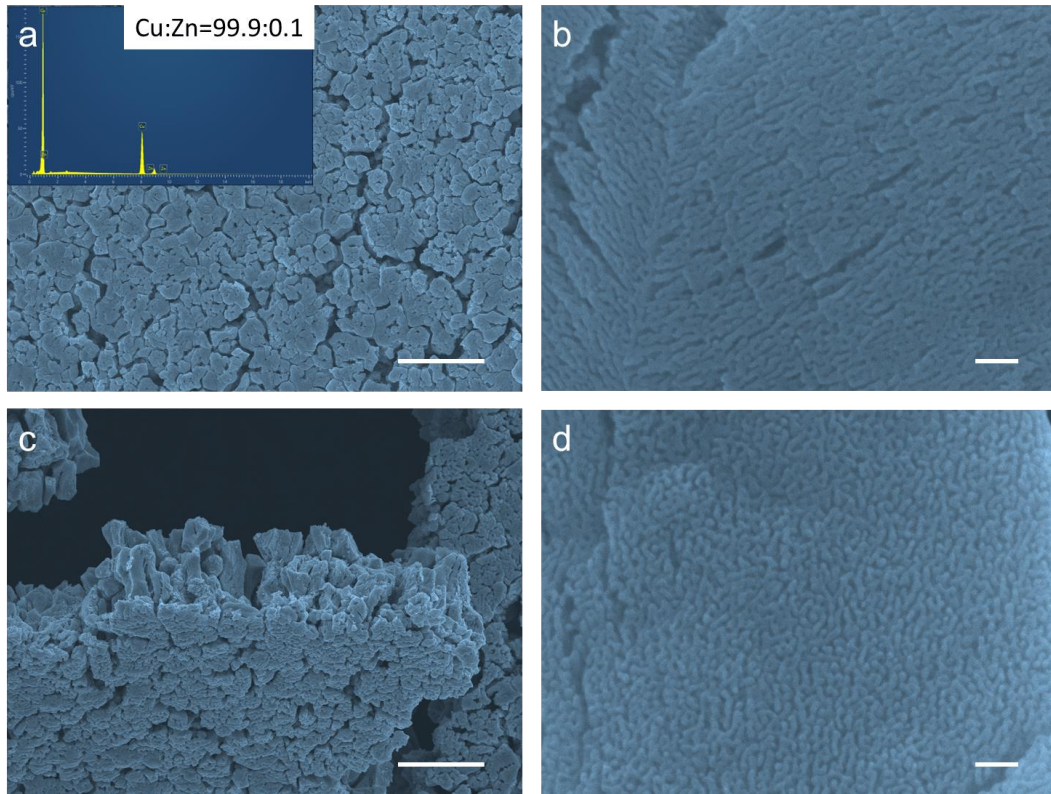

**Supplementary Fig. 14| SEM images of np/Cu.** Insert of (a): Corresponding SEM-EDS elemental distributions. Scale bars: **a, c** 10 μm, **b, d** 100 nm.

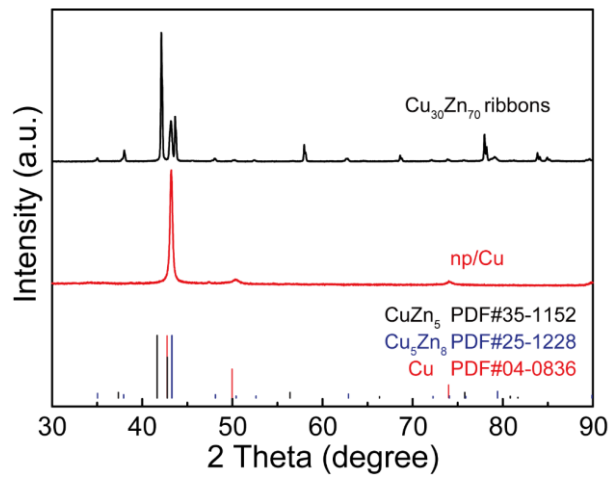

**Supplementary Fig. 15| XRD spectra of  $\text{Cu}_{30}\text{Zn}_{70}$  ribbons and np/Cu.**

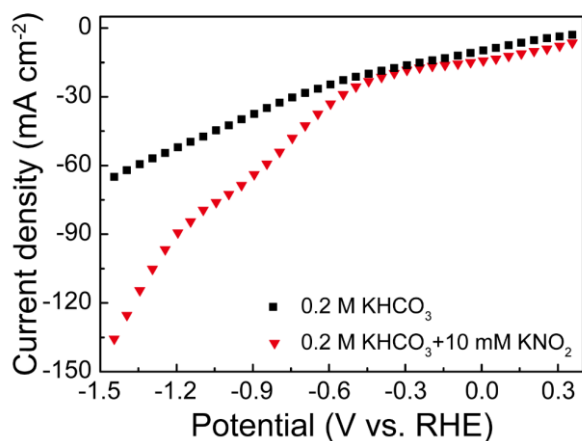

**Supplementary Fig. 16| LSV curves.** LSV curves of np/ISAA-CuZn in 0.2 M KHCO<sub>3</sub> with or without 10 mM of NO<sub>2</sub><sup>-</sup>.

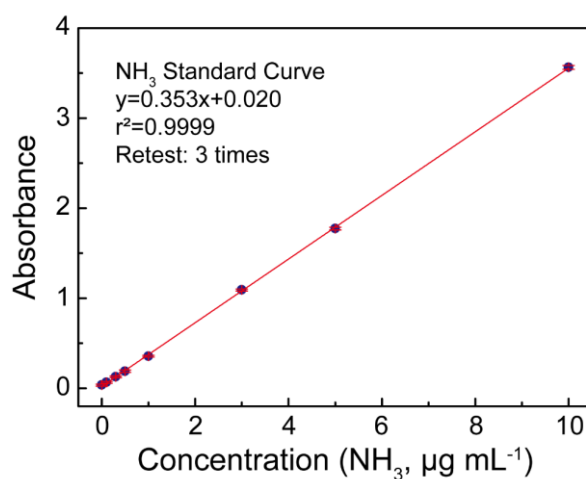

**Supplementary Fig. 17| Calibration curve used for estimation of NH<sub>3</sub>.**

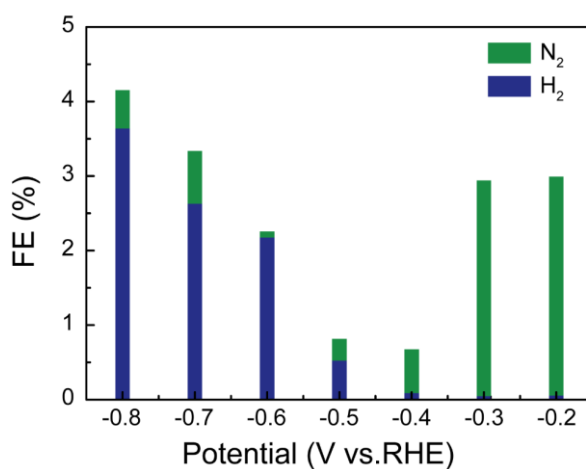

**Supplementary Fig. 18|** The H<sub>2</sub> and N<sub>2</sub> FE of np/ISAA-CuZn at -0.2 - -0.8 V vs. RHE in 0.2 M KHCO<sub>3</sub> + 10 mM KNO<sub>2</sub>.

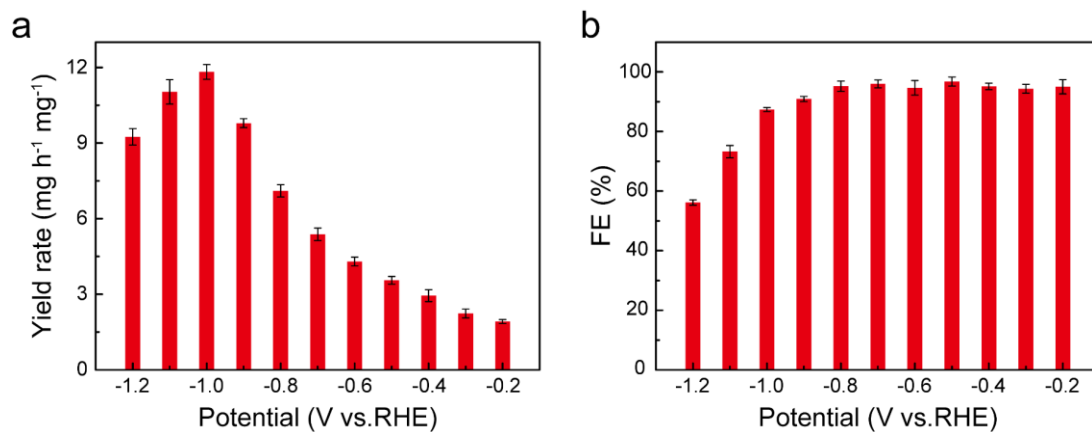

**Supplementary Fig. 19| The NH<sub>3</sub> yield rate and FE of np/ISAA-CuZn.** The NH<sub>3</sub> yield rate (**a**), and FE (**b**) of np/ISAA-CuZn at -0.2 - -1.2 V vs. RHE in 0.2 M KHCO<sub>3</sub> + 10 mM KNO<sub>2</sub>. The error bands represent the standard deviation of the data obtained from more than three repetitions.

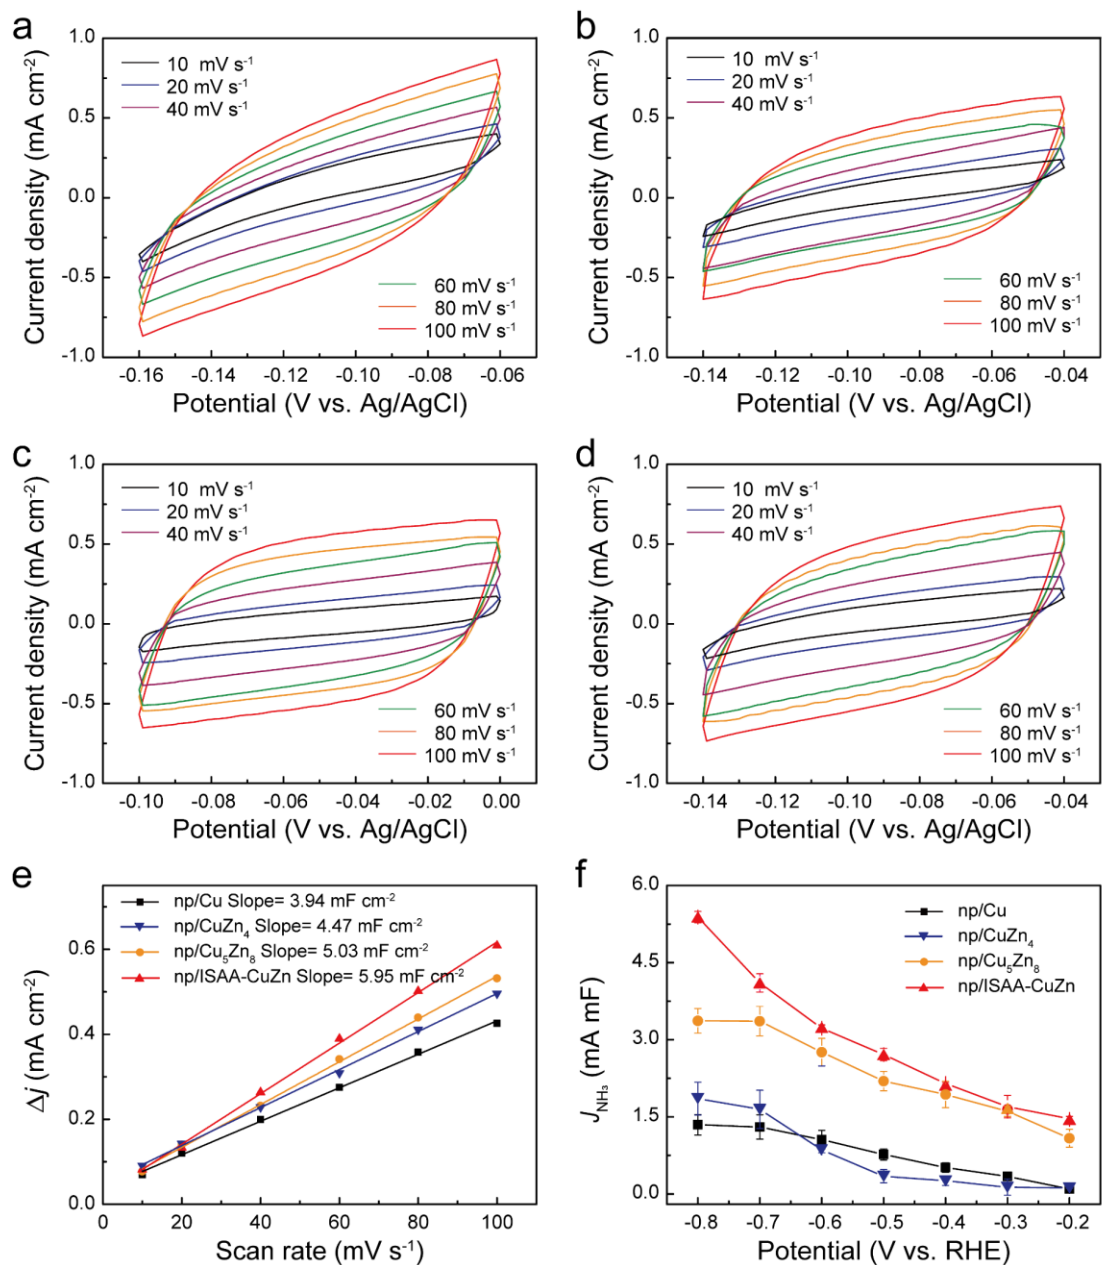

**Supplementary Fig. 20 | Evaluation of intrinsic activity of different catalysts.** Cyclic voltammograms for **a**, np/Cu, and **b**, np/CuZn<sub>4</sub>, **c**, np/Cu<sub>5</sub>Zn<sub>8</sub>, **d**, np/ISAA-CuZn. **e**, Plots of the current density versus the scan rate for np/Cu, np/CuZn<sub>4</sub>, np/Cu<sub>5</sub>Zn<sub>8</sub> and np/ISAA-CuZn. **f**, ECSA-normalized NH<sub>3</sub> current density under different potential of np/Cu, np/CuZn<sub>4</sub>, np/Cu<sub>5</sub>Zn<sub>8</sub> and np/ISAA-CuZn.

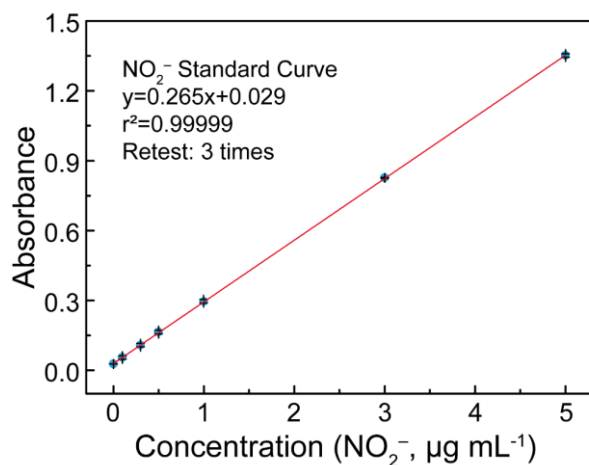

Supplementary Fig. 21| Calibration curve used for estimation of NO<sub>2</sub><sup>-</sup>.

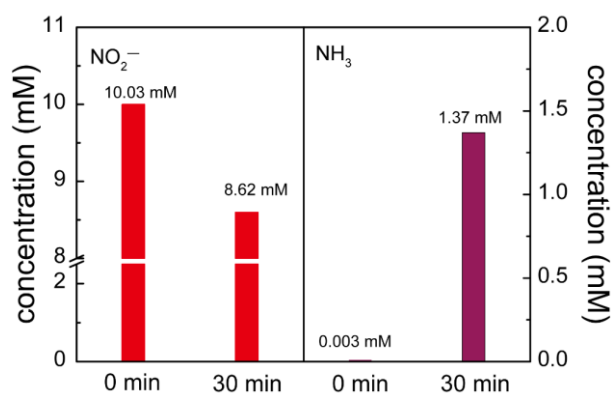

Supplementary Fig. 22| NO<sub>2</sub><sup>-</sup> concentration before and after reaction at -0.5 V vs.

RHE.

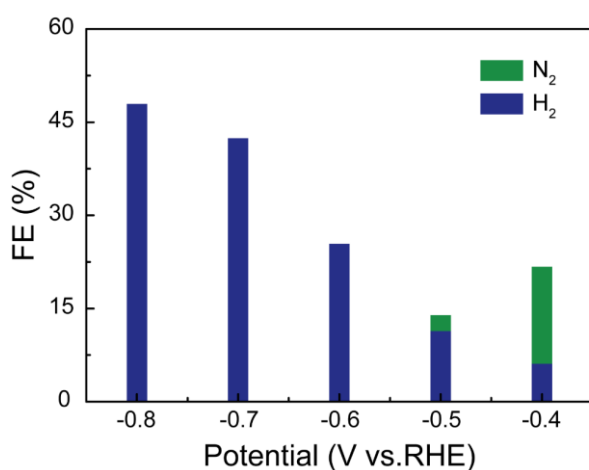

Supplementary Fig. 23| The H<sub>2</sub> and N<sub>2</sub> FE of np/ISAA-CuZn at -0.4 - -0.8 V vs.

RHE in 0.2 M KHCO<sub>3</sub> + 1 mM KNO<sub>2</sub>.

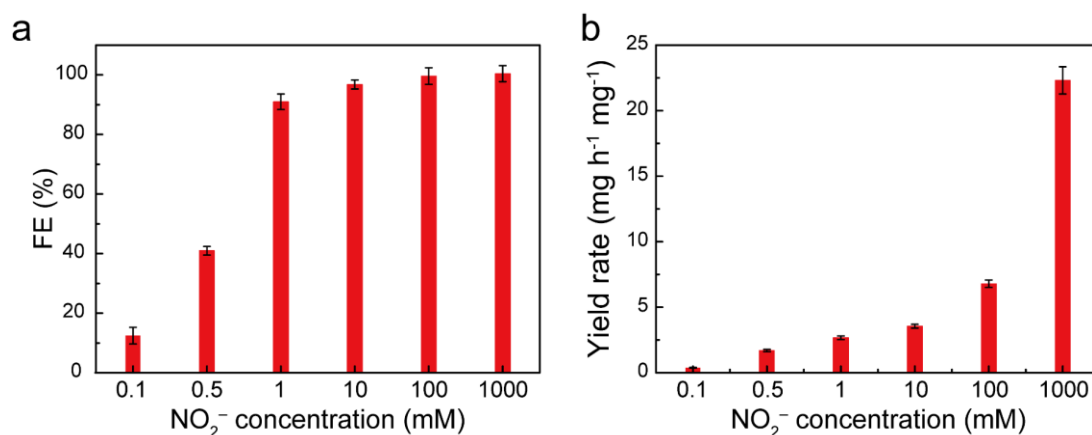

**Supplementary Fig. 24| The NH<sub>3</sub> FE(a) and yield rate (b) for np/ISAA-CuZn with concentrations of NO<sub>2</sub><sup>-</sup> ranging from 0.1 mM to 1000 mM. The error bands represent the standard deviation of the data obtained from more than three repetitions.**

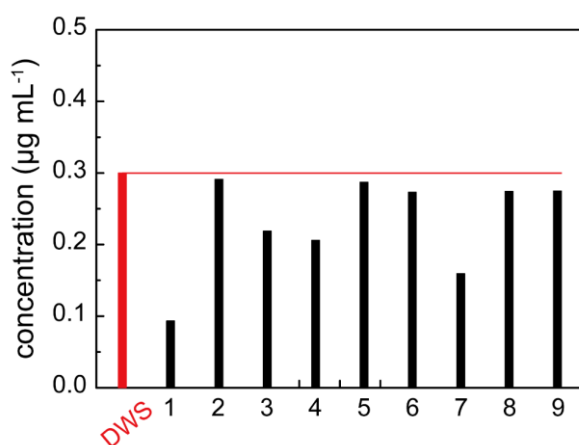

**Supplementary Fig. 25| NO<sub>2</sub><sup>-</sup>-N concentration in solution after MEA test.**

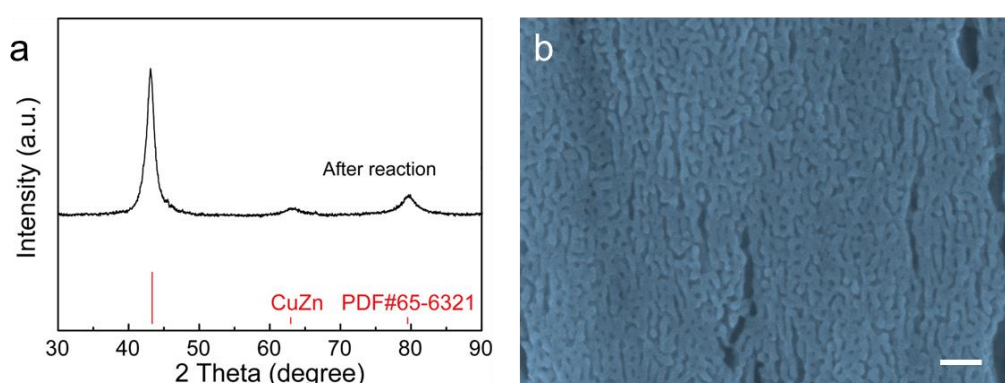

**Supplementary Fig. 26| Morphology and composition of np/ISAA-CuZn after MEA test. a, XRD patten. b, Cross-section SEM image. Scale bar: 100 nm.**



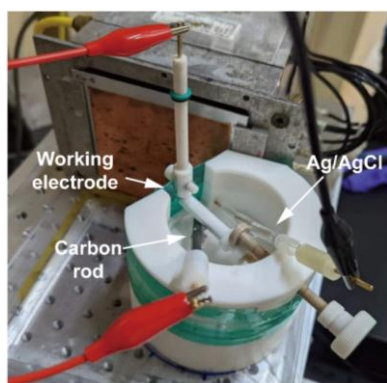

**Supplementary Fig. 27| Optical photograph of the tailor-made electrolytic cell used. for in situ XAS characterization.**

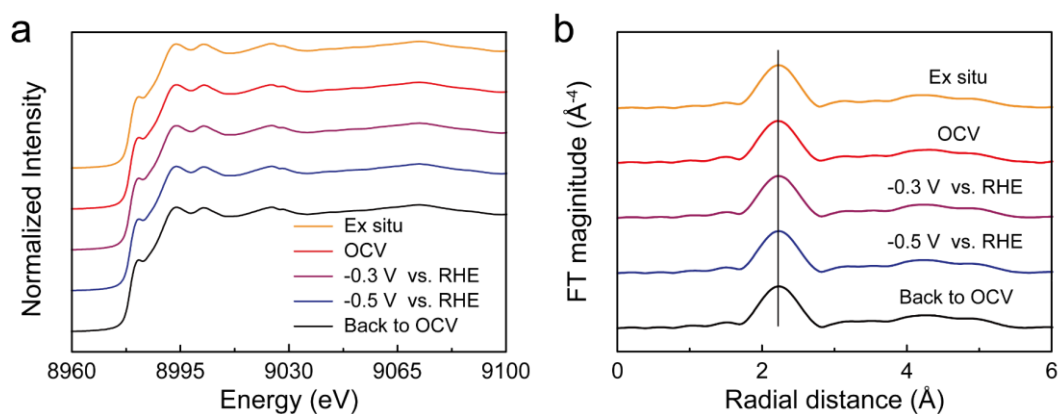

**Supplementary Fig. 28| In situ XAS measurements of np/Cu at different applied potentials. In situ XANES spectra (a) and FT-EXAFS (b) of np/Cu recorded at Cu K-edge.**

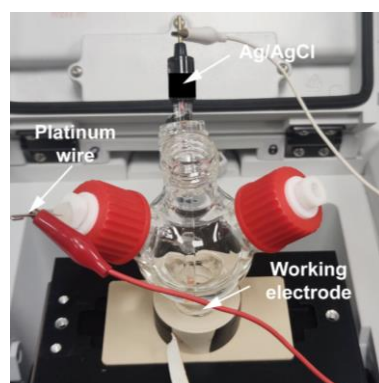

**Supplementary Fig.29| Optical photograph of the tailor-made electrolytic cell used. for in situ ATR-SEIRAS characterization.**

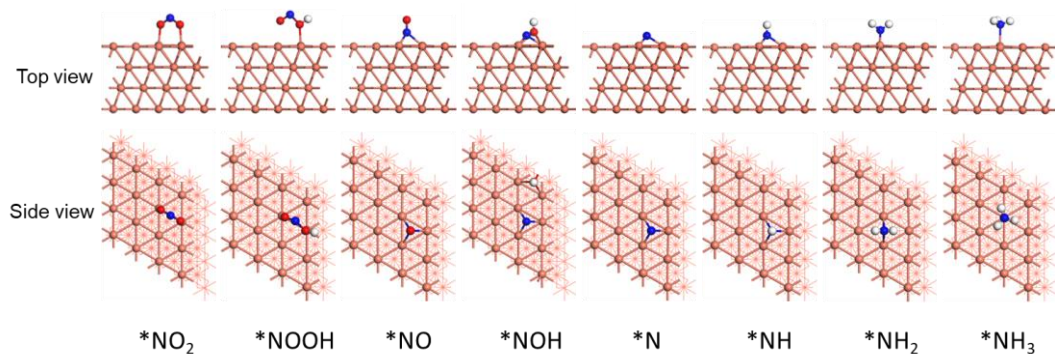

**Supplementary Fig. 30** | Reaction pathway of the NO<sub>2</sub>RR and adsorption models of intermediates on Cu (111) surfaces (Cu: orange, Zn: grey, N: blue, O: red, H: white)

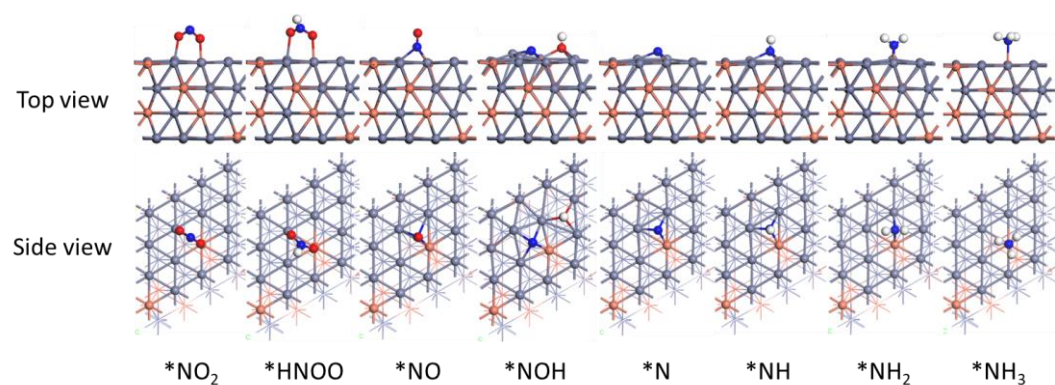

**Supplementary Fig. 31** | Reaction pathway of the NO<sub>2</sub>RR and adsorption models of intermediates on CuZn<sub>4</sub> surfaces (Cu: orange, Zn: grey, N: blue, O: red, H: white).

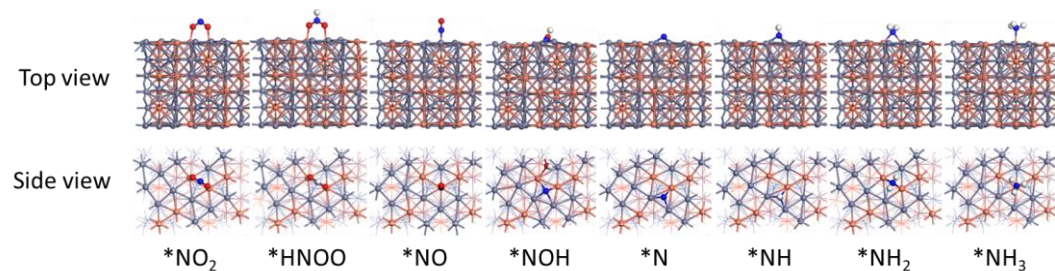

**Supplementary Fig. 32** | Reaction pathway of the NO<sub>2</sub>RR and adsorption models of intermediates on Cu<sub>5</sub>Zn<sub>8</sub> surfaces (Cu: orange, Zn: grey, N: blue, O: red, H: white).

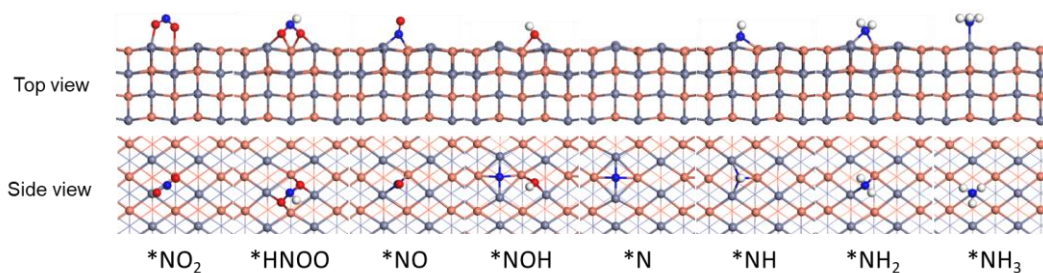

**Supplementary Fig. 33| Reaction pathway of the NO<sub>2</sub>RR and adsorption models of intermediates on ISAA-CuZn surfaces (Cu: orange, Zn: grey, N: blue, O: red, H: white).**

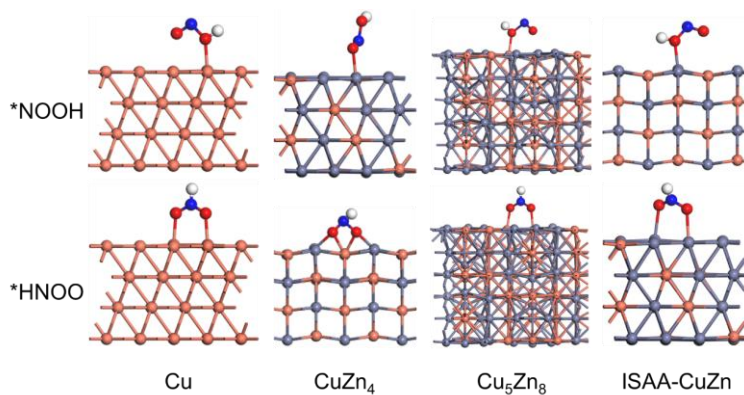

**Supplementary Fig. 34| Modelling of adsorption of \*NOOH and \*HNOO intermediates on Cu, CuZn<sub>4</sub>, Cu<sub>5</sub>Zn<sub>8</sub> and ISAA-CuZn surfaces, respectively.**

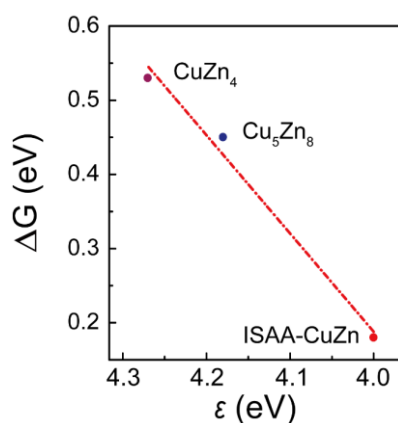

**Supplementary Fig. 35| The relationship between computational  $\epsilon$  and  $\Delta G$  of \*NO<sub>2</sub> protonation.**

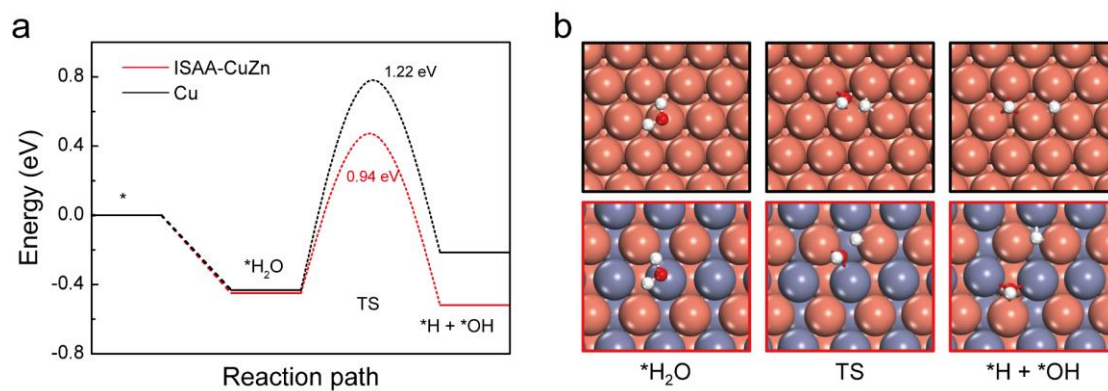

**Supplementary Fig. 36** | Calculated of the water dissociation step on Cu and np/ISAA-CuZn surfaces. **a**, Free energy diagrams, **b**, The structure of the \*H<sub>2</sub>O, transition state (TS), and \*H + \*OH of the reaction process.

**Supplementary Table 1. ICP-OES test result.** Elemental composition of np/ISAA-CuZn.

| Testing element | Atomic Percentage (%) | Mass percentage (%) |
|-----------------|-----------------------|---------------------|
| Cu              | 46.4                  | 45.70               |
| Zn              | 53.6                  | 54.30               |

**Supplementary Table 2. EXAFS fitting parameters.** EXAFS fitting parameters at the Cu K-edge and Zn K-edge for np/CuZn<sub>4</sub>, np/Cu<sub>5</sub>Zn<sub>8</sub>, np/ISAA-CuZn and references sample (Cu foil, CuO and Zn foil).

|              | Samples                            | Path  | CN   | $R$ ( $\text{\AA}$ ) | $\sigma^2(10^{-3} \text{\AA}^2)$ | $\Delta E_0$ (eV) | $R$ -factor |
|--------------|------------------------------------|-------|------|----------------------|----------------------------------|-------------------|-------------|
| Cu K-edge    | Cu foil                            | Cu-Cu | 12   | 2.53                 | 8.4                              | 4.2               | 0.005       |
|              | CuO                                | Cu-O  | 2.7  | 1.94                 | 4.2                              | 7.4               | 0.002       |
|              | np/CuZn <sub>4</sub>               | Cu-Zn | 7.2  | 2.63                 | 11.4                             | 2.0               | 0.02        |
|              | np/Cu <sub>5</sub> Zn <sub>8</sub> | Cu-Cu | 1.8  | 2.54                 | 5.6                              | 5.3               | 0.07        |
|              |                                    | Cu-Zn | 4.5  | 2.61                 | 11.8                             |                   |             |
| np/ISAA-CuZn | Cu-Zn                              | 4.5   | 2.54 | 11.7                 | 10.2                             | 0.013             |             |
| Zn K-edge    | Zn foil                            | Zn-Zn | 8.0  | 2.66                 | 13.2                             | 0.9               | 0.012       |
|              | np/CuZn <sub>4</sub>               | Zn-Cu | 1.8  | 2.63                 | 14.5                             | 3.0               | 0.006       |
|              |                                    | Zn-Zn | 8.9  | 2.64                 | 15.8                             |                   |             |
|              | np/Cu <sub>5</sub> Zn <sub>8</sub> | Zn-Cu | 4.8  | 2.59                 | 9.8                              | 4.1               | 0.006       |
|              |                                    | Zn-Zn | 3.0  | 2.64                 | 12.2                             |                   |             |
| np/ISAA-CuZn | Zn-Cu                              | 3.2   | 2.54 | 12.3                 | 1.5                              | 0.024             |             |

**Supplementary Table 3. Total energy and free energy correction value.** The total energy and free energy correction value of adsorbed NO<sub>2</sub> protonated species over Cu, ISAA-CuZn, Cu<sub>5</sub>Zn<sub>8</sub> and CuZn<sub>4</sub>.

|                                       | E <sub>DFT</sub> | Correction value of G<br>(298.15K, 1 Atm) |
|---------------------------------------|------------------|-------------------------------------------|
| ISAA-CuZn*HNOO                        | -151.54          | 0.52                                      |
| ISAA-CuZn*NOOH                        | -150.99          | 0.33                                      |
| Cu*NOOH                               | -268.85          | 0.38                                      |
| Cu*HNOO                               | -268.80          | 0.43                                      |
| Cu <sub>5</sub> Zn <sub>8</sub> *HNOO | -282.33          | 0.33                                      |
| Cu <sub>5</sub> Zn <sub>8</sub> *NOOH | -282.32          | 0.35                                      |
| CuZn <sub>4</sub> *HNOO               | -149.35          | 0.40                                      |
| CuZn <sub>4</sub> *NOOH               | -149.29          | 0.37                                      |
