# Supplementary material for: Isolating Cu-Zn active-sites in Ordered Intermetallics to Enhance Nitrite-to-Ammonia Electroreduction
Source: PubMed Central journal article supplement — Nat Commun. 2024 Nov 23;15:10173. doi: 10.1038/s41467-024-53897-9 (PMC11585598; doi:10.1038/s41467-024-53897-9), 2024-11-23
Supplement: 41467_2024_53897_MOESM3_ESM.pdf [file 41467_2024_53897_MOESM3_ESM.pdf]

## Description of Additional Supplementary Files

**Supplementary Data 1:** The model of Cu (111), CuZn4 model obtained by substitution of Cu atoms for Zn (0001) surfaces, the model of Cu5Zn8 (110) and ISAA-CuZn (110).
