# Supplementary material for: Isolating Cu-Zn active-sites in Ordered Intermetallics to Enhance Nitrite-to-Ammonia Electroreduction
Source: PubMed Central journal article supplement — Nat Commun. 2024 Nov 23;15:10173. doi: 10.1038/s41467-024-53897-9 (PMC11585598; doi:10.1038/s41467-024-53897-9), 2024-11-23
Supplement: 41467_2024_53897_MOESM4_ESM.pdf [file 41467_2024_53897_MOESM4_ESM.pdf]

Cu-opt

64

Cu 1 0 0.02051  
Cu 0.33333 0.16667 0.0993  
Cu 0.16719 0.33349 0.17592  
Cu -0.00008 0.00005 0.25337  
Cu 0.99995 0.24998 0.02045  
Cu 0.33321 0.41661 0.09921  
Cu 0.16724 0.08389 0.17588  
Cu -0.00013 0.24998 0.25332  
Cu 0.25002 0.24998 0.02045  
Cu 0.08339 0.41661 0.09921  
Cu 0.41727 0.08488 0.17646  
Cu 0.24604 0.24819 0.25325  
Cu 0.25002 0.00005 0.02045  
Cu 0.08339 0.16679 0.09921  
Cu 0.4181 0.33414 0.17695  
Cu 0.2482 -0.00237 0.25283  
Cu 0.5 0 0.02051  
Cu 0.83333 0.16667 0.0993  
Cu 0.66589 0.33407 0.17701  
Cu 0.49919 0.99771 0.25281  
Cu 0.49995 0.24998 0.02045  
Cu 0.83321 0.41661 0.09921  
Cu 0.66653 0.0839 0.17588  
Cu 0.49501 0.2405 0.25734  
Cu 0.75002 0.24998 0.02045  
Cu 0.58339 0.41661 0.09921  
Cu 0.91665 0.08335 0.17571  
Cu 0.75177 0.24822 0.25326  
Cu 0.75002 0.00005 0.02045  
Cu 0.58339 0.16679 0.09921  
Cu 0.91608 0.33345 0.17588  
Cu 0.75001 0.00011 0.25332  
Cu 1 0.5 0.02051  
Cu 0.33333 0.66667 0.0993  
Cu 0.16679 0.83317 0.17535  
Cu 0.00221 0.50077 0.25281  
Cu 0.99995 0.74998 0.02045  
Cu 0.33321 0.91661 0.09921  
Cu 0.16672 0.58384 0.17532  
Cu 0.00231 0.75175 0.25283  
Cu 0.25002 0.74998 0.02045  
Cu 0.08339 0.91661 0.09921

Cu 0.41734 0.58265 0.17645  
Cu 0.24985 0.75009 0.25305  
Cu 0.25002 0.50005 0.02045  
Cu 0.08339 0.66679 0.09921  
Cu 0.41615 0.83325 0.17532  
Cu 0.24817 0.50097 0.2528  
Cu 0.5 0.5 0.02051  
Cu 0.83333 0.66667 0.0993  
Cu 0.66651 0.83281 0.17592  
Cu 0.49493 0.50502 0.25737  
Cu 0.49995 0.74998 0.02045  
Cu 0.83321 0.91661 0.09921  
Cu 0.66582 0.58187 0.17695  
Cu 0.49901 0.75179 0.2528  
Cu 0.75002 0.74998 0.02045  
Cu 0.58339 0.91661 0.09921  
Cu 0.91508 0.5827 0.17647  
Cu 0.75178 0.75394 0.25324  
Cu 0.75002 0.50005 0.02045  
Cu 0.58339 0.66679 0.09921  
Cu 0.91609 0.83274 0.17588  
Cu 0.75937 0.50493 0.25735

CuZn<sub>4</sub>-opt

64

|    |         |         |         |
|----|---------|---------|---------|
| Cu | 0.13333 | 0.17099 | 0.11203 |
| Cu | 0.13205 | 0.16931 | 0.26692 |
| Cu | 0.46762 | 0.00224 | 0.18984 |
| Cu | 0.62968 | 0.16984 | 0.11179 |
| Cu | 0.96558 | 0.00257 | 0.03537 |
| Cu | 0.21655 | 0.25532 | 0.18991 |
| Cu | 0.63373 | 0.41879 | 0.26793 |
| Cu | 0.71675 | 0.25165 | 0.18922 |
| Cu | 0.13325 | 0.6674  | 0.11215 |
| Cu | 0.46665 | 0.5029  | 0.0349  |
| Cu | 0.88425 | 0.6684  | 0.11136 |
| Cu | 0.38372 | 0.9186  | 0.11198 |
| Cu | 0.63219 | 0.91995 | 0.11155 |
| Zn | 0.21466 | 0.00262 | 0.03148 |
| Zn | 0.2219  | 0.01017 | 0.18902 |
| Zn | 0.38427 | 0.15957 | 0.1129  |
| Zn | 0.37841 | 0.16931 | 0.27008 |
| Zn | 0.46678 | 0.00021 | 0.03156 |
| Zn | 0.63418 | 0.1743  | 0.27268 |
| Zn | 0.71587 | 0.00471 | 0.03093 |
| Zn | 0.7104  | 0.00806 | 0.18836 |
| Zn | 0.88111 | 0.16829 | 0.11162 |
| Zn | 0.88019 | 0.17556 | 0.27286 |
| Zn | 0.96247 | 0.00555 | 0.1915  |
| Zn | 0.13098 | 0.42082 | 0.11126 |
| Zn | 0.13342 | 0.41269 | 0.27317 |
| Zn | 0.21649 | 0.25176 | 0.03012 |
| Zn | 0.38223 | 0.41902 | 0.1096  |
| Zn | 0.38668 | 0.41801 | 0.2763  |
| Zn | 0.46677 | 0.25331 | 0.02968 |
| Zn | 0.46631 | 0.2501  | 0.18983 |
| Zn | 0.63297 | 0.41586 | 0.11141 |
| Zn | 0.71556 | 0.25111 | 0.02928 |
| Zn | 0.88325 | 0.42153 | 0.10982 |
| Zn | 0.88365 | 0.41538 | 0.27657 |
| Zn | 0.96686 | 0.24731 | 0.02971 |
| Zn | 0.96872 | 0.25335 | 0.19032 |
| Zn | 0.13319 | 0.66921 | 0.27509 |
| Zn | 0.21876 | 0.50416 | 0.02874 |
| Zn | 0.21757 | 0.49975 | 0.19096 |
| Zn | 0.38041 | 0.67225 | 0.11    |
| Zn | 0.3857  | 0.66761 | 0.27531 |

|    |         |         |         |
|----|---------|---------|---------|
| Zn | 0.46951 | 0.49877 | 0.1922  |
| Zn | 0.63298 | 0.67693 | 0.11032 |
| Zn | 0.63322 | 0.66622 | 0.27539 |
| Zn | 0.71117 | 0.5021  | 0.02691 |
| Zn | 0.71684 | 0.5003  | 0.19228 |
| Zn | 0.88235 | 0.66863 | 0.27518 |
| Zn | 0.96568 | 0.50415 | 0.02866 |
| Zn | 0.96636 | 0.50223 | 0.19072 |
| Zn | 0.13419 | 0.92063 | 0.11085 |
| Zn | 0.13346 | 0.92497 | 0.27407 |
| Zn | 0.21417 | 0.75333 | 0.02856 |
| Zn | 0.2156  | 0.7532  | 0.19043 |
| Zn | 0.37955 | 0.92432 | 0.27336 |
| Zn | 0.4643  | 0.75123 | 0.02815 |
| Zn | 0.46615 | 0.75788 | 0.19028 |
| Zn | 0.63042 | 0.92163 | 0.27262 |
| Zn | 0.7178  | 0.75437 | 0.03076 |
| Zn | 0.71411 | 0.7574  | 0.18967 |
| Zn | 0.87911 | 0.91526 | 0.10948 |
| Zn | 0.88116 | 0.92044 | 0.27427 |
| Zn | 0.96839 | 0.75352 | 0.03061 |
| Zn | 0.96645 | 0.75135 | 0.18884 |

Cu<sub>5</sub>Zn<sub>8</sub>-opt

104

|    |         |         |         |
|----|---------|---------|---------|
| Zn | 0.99493 | 0.69554 | 0.1765  |
| Zn | 0.00835 | 0.18813 | 0.37993 |
| Zn | 0.00764 | 0.96652 | 0.03854 |
| Zn | 0.99466 | 0.45909 | 0.24192 |
| Zn | 0.36646 | 0.6491  | 0.16949 |
| Zn | 0.37104 | 0.15178 | 0.37363 |
| Zn | 0.37151 | 0.00346 | 0.04485 |
| Zn | 0.36676 | 0.50601 | 0.24903 |
| Zn | 0.99465 | 0.95941 | 0.17653 |
| Zn | 0.0073  | 0.46698 | 0.37991 |
| Zn | 0.36677 | 0.00598 | 0.16953 |
| Zn | 0.37154 | 0.50381 | 0.37364 |
| Zn | 0.00781 | 0.68807 | 0.03853 |
| Zn | 0.99457 | 0.1958  | 0.24191 |
| Zn | 0.37144 | 0.65142 | 0.04477 |
| Zn | 0.36682 | 0.14902 | 0.24892 |
| Zn | 0.71953 | 0.32743 | 0.03563 |
| Zn | 0.7206  | 0.82729 | 0.23046 |
| Zn | 0.65782 | 0.50879 | 0.11041 |
| Zn | 0.65787 | 0.00902 | 0.30805 |
| Zn | 0.65794 | 0.14637 | 0.11031 |
| Zn | 0.65812 | 0.64657 | 0.30803 |
| Zn | 0.72053 | 0.32753 | 0.18793 |
| Zn | 0.71942 | 0.82794 | 0.3829  |
| Zn | 0.49493 | 0.19554 | 0.1765  |
| Zn | 0.50835 | 0.68813 | 0.37993 |
| Zn | 0.50764 | 0.46652 | 0.03854 |
| Zn | 0.49466 | 0.9591  | 0.24192 |
| Zn | 0.86646 | 0.1491  | 0.16949 |
| Zn | 0.87104 | 0.65178 | 0.37363 |
| Zn | 0.87151 | 0.50346 | 0.04485 |
| Zn | 0.86676 | 0.00601 | 0.24903 |
| Zn | 0.49465 | 0.45941 | 0.17653 |
| Zn | 0.5073  | 0.96698 | 0.37991 |
| Zn | 0.86677 | 0.50598 | 0.16953 |
| Zn | 0.87154 | 0.00381 | 0.37364 |
| Zn | 0.50781 | 0.18807 | 0.03853 |
| Zn | 0.49457 | 0.6958  | 0.24191 |
| Zn | 0.87144 | 0.15142 | 0.04477 |
| Zn | 0.86682 | 0.64902 | 0.24892 |
| Zn | 0.21953 | 0.82743 | 0.03563 |
| Zn | 0.2206  | 0.32729 | 0.23046 |

|    |         |         |         |
|----|---------|---------|---------|
| Zn | 0.15782 | 0.00879 | 0.11041 |
| Zn | 0.15787 | 0.50902 | 0.30805 |
| Zn | 0.15794 | 0.64637 | 0.11031 |
| Zn | 0.15812 | 0.14655 | 0.30802 |
| Zn | 0.22053 | 0.82753 | 0.18793 |
| Zn | 0.21942 | 0.32794 | 0.3829  |
| Zn | 0.78045 | 0.82756 | 0.14792 |
| Zn | 0.79053 | 0.32729 | 0.36351 |
| Zn | 0.79049 | 0.82722 | 0.05494 |
| Zn | 0.78026 | 0.32767 | 0.27057 |
| Zn | 0.55799 | 0.71289 | 0.11099 |
| Zn | 0.55796 | 0.21302 | 0.30753 |
| Zn | 0.55808 | 0.94238 | 0.11097 |
| Zn | 0.558   | 0.44244 | 0.3075  |
| Zn | 0.28045 | 0.32756 | 0.14792 |
| Zn | 0.29053 | 0.82729 | 0.36351 |
| Zn | 0.29049 | 0.32722 | 0.05494 |
| Zn | 0.28026 | 0.82767 | 0.27057 |
| Zn | 0.05799 | 0.21289 | 0.11099 |
| Zn | 0.05796 | 0.71302 | 0.30753 |
| Zn | 0.05808 | 0.44238 | 0.11097 |
| Zn | 0.05799 | 0.94244 | 0.3075  |
| Cu | 0.03127 | 0.82763 | 0.1099  |
| Cu | 0.03129 | 0.32774 | 0.30864 |
| Cu | 0.31896 | 0.82774 | 0.11349 |
| Cu | 0.31902 | 0.32783 | 0.30494 |
| Cu | 0.67554 | 0.00484 | 0.18094 |
| Cu | 0.66619 | 0.51169 | 0.37494 |
| Cu | 0.66599 | 0.64295 | 0.04356 |
| Cu | 0.67581 | 0.15022 | 0.23765 |
| Cu | 0.67543 | 0.65002 | 0.18077 |
| Cu | 0.66589 | 0.14332 | 0.37493 |
| Cu | 0.66627 | 0.01153 | 0.04348 |
| Cu | 0.67548 | 0.50489 | 0.23761 |
| Cu | 0.53127 | 0.32763 | 0.1099  |
| Cu | 0.53129 | 0.82774 | 0.30864 |
| Cu | 0.81896 | 0.32774 | 0.11349 |
| Cu | 0.81902 | 0.82783 | 0.30494 |
| Cu | 0.17554 | 0.50484 | 0.18094 |
| Cu | 0.16619 | 0.01169 | 0.37494 |
| Cu | 0.16599 | 0.14295 | 0.04356 |
| Cu | 0.17581 | 0.65022 | 0.23765 |
| Cu | 0.17543 | 0.15002 | 0.18077 |
| Cu | 0.16589 | 0.64331 | 0.37493 |

|    |         |         |         |
|----|---------|---------|---------|
| Cu | 0.16627 | 0.51153 | 0.04348 |
| Cu | 0.17548 | 0.00489 | 0.23761 |
| Cu | 0.5074  | 0.82754 | 0.17798 |
| Cu | 0.51006 | 0.32764 | 0.3734  |
| Cu | 0.51002 | 0.82737 | 0.04512 |
| Cu | 0.50751 | 0.32758 | 0.24041 |
| Cu | 0.85341 | 0.65468 | 0.10862 |
| Cu | 0.8534  | 0.15468 | 0.3099  |
| Cu | 0.85322 | 0.00054 | 0.10861 |
| Cu | 0.85311 | 0.50058 | 0.3098  |
| Cu | 0.0074  | 0.32754 | 0.17798 |
| Cu | 0.01006 | 0.82764 | 0.3734  |
| Cu | 0.01002 | 0.32738 | 0.04512 |
| Cu | 0.00751 | 0.82758 | 0.24041 |
| Cu | 0.35341 | 0.15468 | 0.10862 |
| Cu | 0.3534  | 0.65468 | 0.3099  |
| Cu | 0.35322 | 0.50054 | 0.10861 |
| Cu | 0.35311 | 0.00058 | 0.3098  |

ISAA-CuZn-opt

52

|    |         |          |         |
|----|---------|----------|---------|
| Zn | 0.11494 | 0.00003  | 0.01046 |
| Zn | 0.11487 | 0.2499   | 0.10021 |
| Zn | 0.11484 | 0.00004  | 0.16954 |
| Zn | 0.11523 | 0.25005  | 0.25917 |
| Zn | 0.44826 | 0.00001  | 0.01048 |
| Zn | 0.44822 | 0.24995  | 0.10022 |
| Zn | 0.4482  | 0.00005  | 0.16954 |
| Zn | 0.44853 | 0.24998  | 0.25918 |
| Zn | 0.78162 | 0.00003  | 0.01046 |
| Zn | 0.78159 | 0.24993  | 0.10022 |
| Zn | 0.78149 | 0.00002  | 0.16955 |
| Zn | 0.78184 | 0.24997  | 0.25917 |
| Zn | 0.11495 | 0.5      | 0.01048 |
| Zn | 0.11483 | 0.74988  | 0.10023 |
| Zn | 0.11485 | 0.50005  | 0.16955 |
| Zn | 0.11523 | 0.74996  | 0.25918 |
| Zn | 0.4483  | 0.50002  | 0.01048 |
| Zn | 0.44827 | 0.74997  | 0.10018 |
| Zn | 0.44818 | 0.50005  | 0.16953 |
| Zn | 0.44852 | 0.75003  | 0.25919 |
| Zn | 0.78158 | 0.50003  | 0.01046 |
| Zn | 0.7816  | 0.74995  | 0.10021 |
| Zn | 0.78147 | 0.50004  | 0.16953 |
| Zn | 0.78184 | 0.75003  | 0.25915 |
| Cu | 0.28175 | 0.25003  | 0.02242 |
| Cu | 0.28149 | -0.00009 | 0.09084 |
| Cu | 0.28174 | 0.24997  | 0.17887 |
| Cu | 0.28164 | 0.00002  | 0.24743 |
| Cu | 0.61502 | 0.25001  | 0.02243 |
| Cu | 0.61485 | 0.00004  | 0.09082 |
| Cu | 0.61507 | 0.24998  | 0.17885 |
| Cu | 0.61499 | 0        | 0.24745 |
| Cu | 0.9483  | 0.25002  | 0.02242 |
| Cu | 0.9482  | -0.00004 | 0.09082 |
| Cu | 0.94841 | 0.25003  | 0.17887 |
| Cu | 0.94827 | 0.00002  | 0.2474  |
| Cu | 0.2817  | 0.75     | 0.02243 |
| Cu | 0.28148 | 0.50007  | 0.09083 |
| Cu | 0.2817  | 0.74996  | 0.17884 |
| Cu | 0.28163 | 0.50002  | 0.24741 |
| Cu | 0.6151  | 0.75002  | 0.02241 |
| Cu | 0.61488 | 0.49999  | 0.09082 |



|    |         |         |         |
|----|---------|---------|---------|
| Cu | 0.61494 | 0.74998 | 0.17885 |
| Cu | 0.61493 | 0.50001 | 0.24743 |
| Cu | 0.94835 | 0.75001 | 0.02239 |
| Cu | 0.94817 | 0.49997 | 0.09082 |
| Cu | 0.94827 | 0.74999 | 0.17888 |
| Cu | 0.94827 | 0.50001 | 0.24743 |
